# Supplementary material for: Endothelial Colony‐Forming Cells in Young Adults Born Preterm: A Novel Link Between Neonatal Complications and Adult Risks for Cardiovascular Disease
Source: PubMed Central journal article supplement — J Am Heart Assoc. 2018 Jul 9;7(14):e009720. doi: 10.1161/JAHA.118.009720 (PMC6064846; doi:10.1161/jaha.118.009720), 2018-07-09
Supplement: JAH3-7-e009720-s001.pdf [file JAH3-7-e009720-s001.pdf]

# **SUPPLEMENTAL MATERIAL**

**Table S1. Clinical characteristics of study participants born full-term and preterm with and without day-time (awake) ambulatory blood pressure monitoring (ABPM).**

| Clinical Characteristics                      | Term        |                | Preterm     |                | ABPM | P      |             |
|-----------------------------------------------|-------------|----------------|-------------|----------------|------|--------|-------------|
|                                               | ABPM (n=33) | No ABPM (n=22) | ABPM (n=36) | No ABPM (n=19) |      | Term   | Interaction |
| Gestational age, weeks                        | 39 ± 1      | 40 ± 1         | 27 ± 1      | 27 ± 2         | .903 | <.0001 | .357        |
| Birth weight, g                               | 3346 ± 339  | 3546 ± 448     | 995 ± 216   | 988 ± 251      | .134 | <.0001 | .107        |
| Age, years                                    | 23 ± 2      | 23 ± 2         | 24 ± 2      | 23 ± 3         | .059 | .564   | .534        |
| Male sex, %                                   | 33%         | 46%            | 33%         | 47%            | .180 | .922   | .922        |
| Height, cm                                    | 169 ± 8     | 171 ± 7        | 167 ± 9     | 166 ± 10       | .628 | .045   | .382        |
| Weight, Kg                                    | 67 ± 15     | 72 ± 13        | 61 ± 12     | 59 ± 12        | .545 | .001   | .145        |
| BMI, Kg/m <sup>2</sup>                        | 23 ± 4      | 25 ± 5         | 22 ± 3      | 21 ± 4         | .596 | .003   | .183        |
| Peak VO <sub>2</sub> , ml/min/Kg              | 35 ± 9      | 31 ± 9         | 33 ± 9      | 31 ± 6         | .140 | .686   | .629        |
| Smoking, %                                    | 15%         | 18%            | 19%         | 26%            | .531 | .432   | .808        |
| 2-hours glycemia, mmol/L                      | 6.3 ± 1.3   | 6.3 ± 1.2      | 7.0 ± 1.5   | 7.2 ± 1.2      | .532 | .005   | .730        |
| Resting SBP, mm Hg                            | 114 ± 9     | 117 ± 10       | 119 ± 11    | 116 ± 7        | .894 | .384   | .190        |
| Resting DBP, mm Hg                            | 65 ± 7      | 67 ± 9         | 69 ± 7      | 67 ± 6         | .868 | .496   | .829        |
| Left ventricular mass index, g/m <sup>2</sup> | 63 ± 15     | 64 ± 12        | 62 ± 11     | 62 ± 17        | .867 | .496   | .829        |
| Left ventricular ejection fraction, %         | 63 ± 5      | 61 ± 5         | 63 ± 6      | 65 ± 6         | .598 | .040   | .043        |
| Days to 1 <sup>st</sup> colony, days          | 15 ± 6      | 14 ± 4         | 15 ± 4      | 16 ± 4         | .959 | .246   | .538        |

ABPM, ambulatory blood pressure monitoring; BMI, body mass index; Peak VO<sub>2</sub>, peak oxygen consumption; SBP, systolic blood pressure; DBP, diastolic blood pressure. Within each study group (term and preterm), subjects with vs. without ABMP were compared using two-way ANOVA and Bonferroni *post-hoc* test. No statistically significant differences were noted.

**Table S2. Clinical and perinatal characteristics of study participants born full-term and preterm with ECFC colony growth.**

|                                                                   | Term<br>n=34 | Preterm<br>n=32 | <i>P</i> |
|-------------------------------------------------------------------|--------------|-----------------|----------|
| <b>Clinical characteristics</b>                                   |              |                 |          |
| <b>Perinatal characteristics</b>                                  |              |                 |          |
| Gestational age, weeks,                                           | 39.6 ± 1.1   | 27.1 ± 1.3      | <.001    |
| Birth weight, g                                                   | 3363 ± 299   | 978 ± 218       | <.001    |
| Small for gestational age, n (%) <sup>(†)</sup>                   | 2 (7)        | 2 (6)           | .392     |
| Hypertensive complications of pregnancy, n (%)                    | 2 (6)        | 5 (16)          | .251     |
| Antenatal corticosteroids, n/N (%)                                | N/A          | 13/30 (43)      |          |
| Bronchopulmonary dysplasia, n/N (%) <sup>(§)</sup>                | N/A          | 6/31 (19)       |          |
| <b>Adult characteristics</b>                                      |              |                 |          |
| Age, years                                                        | 23 ± 2       | 23 ± 2          | .329     |
| Male sex, n (%)                                                   | 13 (38)      | 13 (41)         | 1.00     |
| Height, cm                                                        | 169 ± 7      | 167 ± 10        | .483     |
| Weight, kg                                                        | 68 ± 15      | 60 ± 12         | .028     |
| BMI, kg/m <sup>2</sup>                                            | 24 ± 4       | 21 ± 3          | .016     |
| Peak VO <sub>2</sub> , ml/min/kg of lean body mass <sup>(∞)</sup> | 33 ± 9       | 33 ± 9          | .862     |
| Smoking, n (%)                                                    | 4 (12)       | 5 (16)          | .730     |
| 2-hours glucose, mmol/L                                           | 6.4 ± 1.3    | 7.0 ± 1.4       | .093     |
| Resting SBP, mm Hg                                                | 116 ± 11     | 117 ± 8         | .612     |
| Resting DBP, mm Hg                                                | 66 ± 8       | 67 ± 6          | .401     |
| Day-time ABPM SBP, mm Hg <sup>(¥)</sup>                           | 119 ± 8      | 124 ± 10        | .073     |
| Day-time ABPM DBP, mm Hg <sup>(¥)</sup>                           | 71 ± 5       | 75 ± 6          | .049     |
| Left ventricular mass index, g/m <sup>2</sup>                     | 64 ± 12      | 63 ± 14         | .758     |
| Left ventricular ejection fraction, %                             | 62 ± 5       | 64 ± 6          | .435     |

<sup>(†)</sup>Birth weight < 10th percentile for gestational age; <sup>(§)</sup>supplemental oxygen requirement at 36 weeks post menstrual age; BMI, body mass index; <sup>(∞)</sup>VO<sub>2</sub>, peak oxygen consumption measured in a subgroup of 25 participants per group; SBP, systolic blood pressure; DBP, diastolic blood pressure; <sup>(¥)</sup> ABPM, ambulatory blood pressure monitoring determined in a subgroup of 23 term and 22 preterm subjects. N/A, not applicable. Data are mean ± standard deviation (SD) unless stated otherwise. Independent t-test or  $\chi^2$ -test.
